# Supplementary material
Source: Springer Nature journal article supplement (https://www.springermedizin.de/resource/supplementary/12903_2012_261_MOESM1_ESM.pdf/9516452)

Restorations,  $p=0.016$  Extractions,  $p=0.189$  Endodontics,  $p<0.001$   
Prevention,  $p<0.001$  Periodontics,  $p<0.001$

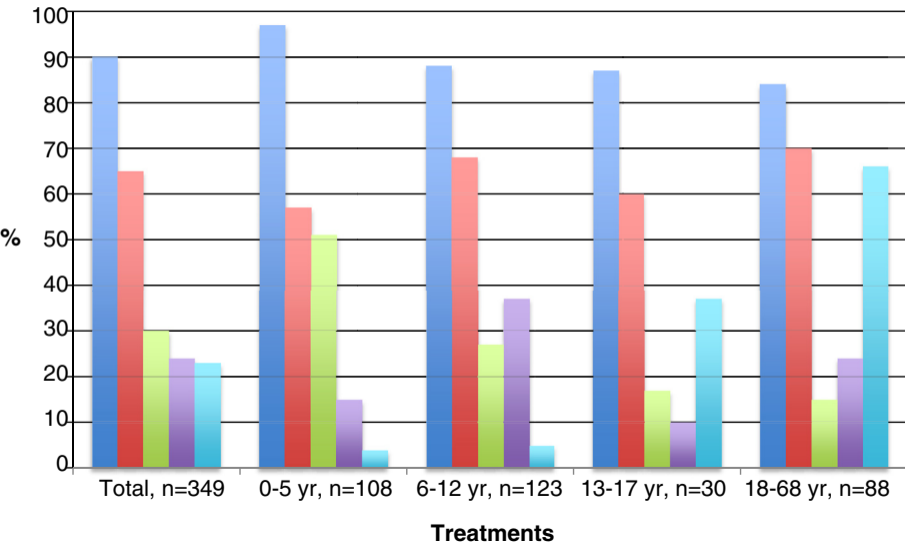

Supplement: MOESM1 [file 9516452]
